# Supplementary material for: Gravity wave induced cross-isentropic mixing: A DEEPWAVE case study
Source: Copernicus journal article supplement (doi:10.5194/acp-2022-420), 2022-07-06
Supplement: Supplementary file [file acp-2022-420-AC1-supplement.pdf]

## Overall Remarks:

This paper presents a thorough and detailed analysis of a gravity wave induced atmospheric mixing event measured during the 2014 DEEPWAVE campaign in New Zealand. Through a combination of in-situ aircraft observations and ERA5 reanalysis data, the authors identify two distinct layers in the lower stratosphere with independent composition and isentropic characteristics. They then show how the N<sub>2</sub>O-to-potential temperature gradient weakens due to gravity wave activity, and they identify signs of turbulence and trace gas fluxes to diagnose mixing between these two layers induced by the gravity waves. This mixing mechanism is distinct from past gravity wave-induced mixing studies in that it is cross-isentropic/diabatic/irreversible and yields nonlocal consequences downstream of the orographic mixing source.

- Overall, this paper presents a clear and logical sequence of results and diagnostics supporting the main arguments of the text. I recommend that this paper be accepted for publication in ACP after addressing the minor revisions detailed below in two general comments on the use of terminology/writing structure and in line-by-line specific comments. The technical nature of the paper and use of complex, codependent sentence structures can make the arguments of the paper difficult to follow and less approachable to members of the larger gravity wave community. To enhance readability and make the paper more broadly accessible to general audiences, a few simple modifications to the writing style and sentence structure would be beneficial as detailed below. There are also several specific comments regarding how variables are discussed/plotted and the possibility of using additional data from the HIAPER aircraft, if available.

## Authors response:

- We thank the reviewer for the careful reading and the constructive suggestions to improve the accessibility to a broader community. We tried to follow most of the suggestions and hope to have satisfied the criticism.

The major changes are as follows:

- 1) We included a definition section to the manuscript to clarify the terminology. We checked the manuscript for a consistent wording particularly of the multi-word expressions.
  - 2) We removed Fig. 1 and included the wind information into the former Fig. 2 as suggested.
  - 3) We checked the terminology of the N<sub>2</sub>O- $\Theta$  relationship and the expressions referring to slopes and ratios. We thereby kept our original idea to just use one way of expression to quantify slopes and ratios. This is directly deduced from the intuitively native way of analyzing vertical profiles with potential temperature as y-axis (similar to the discussion of temperature profiles, which are commonly shown as temperature on the x-axis and  $\Theta$  or altitude as y-axis). We therefore wanted to keep the emerging quotient throughout the manuscript with N<sub>2</sub>O in the numerator and  $\Theta$  in the nominator. We think this facilitates to follow any discussions instead of introducing inverted relationships. This is consistently done through the paper, independent of the analysis which relates N<sub>2</sub>O to  $\Theta$ . The reader does not need to link the ratio to a specific analysis step or Figure. We think, this facilitates the thinking. We added a note on this, when first introducing the scheme in former Fig. 8 (*former Fig. 9*).
- New text:
- Note that we will use in the following the inverse relation  $\partial\Theta/\partial N_2O$  to be mathematically be consistent with the profiles shown in Fig.8 (*former Fig. 9*) and in Fig. 7 (*former Fig. 8*). We will consequently apply this convention with  $\Theta$  in the numerator and N<sub>2</sub>O in the enumerator throughout the paper and will keep the same convention for any analysis which follows below.

## General Comments:

1. The use of overlapping terminology to describe related transport phenomena, while technically correct in all instances, makes certain aspects of this manuscript esoteric and difficult to approach for readers lacking a comprehensive background in atmospheric chemistry and tracer transport (example: phrases describing cross-isentropic/diabatic/irreversible circulation/transport/fluxes/mixing use pairs of these words somewhat interchangeably). The terminology in this manuscript also employs a number of related words with opposite meanings (example: a cross-isentropic process is not an isentropic process), which can confuse the reader when neither term is defined. When combined, these two terminology complexities make this paper less accessible for general audiences in the broader atmospheric community.

I suggest two terminology approaches to improve the readability and accessibility of the text:

- 5 a) Provide some basic definitions of terms when they are introduced to explain what they mean in the context of the other terminology used in the text (as an example, it is not explicitly stated until Page 13 that “cross-isentropic” and “diabatic” are used equivalently throughout the text because transport processes crossing lines of constant potential temperature, i.e. isentropes, are inherently diabatic). If the text states early on that cross-isentropic processes are both diabatic and irreversible, later descriptions in the text using “diabatic” and “reversible” can in many instances use the expression “cross-isentropic” since the reader will know this always refers to diabatic, irreversible processes. Though the text does define some terms like orographic gravity waves (Page 1 line 1) and passive tracers (Page 1 line 32), more definitions could be used throughout the text.
- 10 b) For multi-word dynamical behaviors, try to use consistent wording and word order to avoid confusing the reader. As an example, three sets of similar expressions are used on page 2 that alter the wording/order of two expressions meaning the same thing:

- 15 cross-isentropic mixing (line 8)  
non-isentropic transport (lines 14-15)

- vertical turbulent tracer flux (line 28)  
turbulent vertical tracer flux (lines 29-30, word order switched)

- 20 Mountain wave induced tracer fluxes (line 29)  
gravity wave induced vertical cross-isentropic tracer transport (line 31)

- It may also be useful to employ acronyms for commonly used phrases to avoid having 8-word expressions for a physical concept like “gravity wave induced vertical cross-isentropic tracer transport”. This will make it easier for the reader group multiword dynamical descriptions and parse out the surrounding sentence structure.

#### Authors response:

- 30 We took the suggestion and included a definition paragraph to the introduction to make the text more consistent. Some of the terms are redundant in aspects of their meaning (e.g. diabatic, irreversible, cross isentropic: these three all indicate a change of entropy and thus irreversibility of a process. Though they are used in a different way in the different communities. Cross-isentropic flux emphasizes the transport nature for irreversible transport of tracers and the quasi-vertical direction as opposed to quasi-isentropic mixing. All are diabatic and irreversible since  $\Theta$  is not conserved indicating a change of entropy. With regard to tracer mixing there is also a mixture of terms and meanings between the communities - in dynamics mostly the dynamical processes are referred to by ‘mixing’, other communities refer to the aspect of irreversible constituent exchange by using the term ‘mixing’.

- 35 We hope that we made the paper more clear with the newly included definition part. We are hesitant to include newly defined abbreviations since they make the text more difficult to fluent reading, if the reader has to look up non-common acronyms. Instead we followed the reviewers suggestion by avoiding swapping adjectives in multiword expressions and reducing their number.

2. Many sentences start with a pronoun (this/that/they/those/these, etc.) or a broad, unspecific term (our hypothesis, our conclusions, etc.) referring to the content of a previous sentence or paragraph. Often, due to the complexity of the referenced sentences/paragraphs, it is not clear what content these expressions refer to, requiring the reader to often go back to the referenced sentence to identify which topic from the previous sentence matches the description in the next sentence. To add clarity to the text, please try to avoid this sentence structure and instead state explicitly the topic of each sentence and the content being referenced. This can be applied throughout the text, with several examples identified in the Specific Comments below.

**Authors response:**

We checked the manuscript and added specific expressions instead of general wordings.

5

**Specific Comments line-by-line:**

10 **Comment Page 1 Line 1:** please explain the term cross-isentropic when it is first introduced, clarifying how it refers to an irreversible diabatic process to avoid confusion when these terms are later used to describe this same phenomenon.

15 **Reply to comment:** We introduced the term 'cross-isentropic' to emphasize the aspect of tracer mixing processes across isentropes and to differentiate from the term quasi-isentropic mixing, related to stirring and mixing initiated mostly by planetary waves (e.g. Plumb, 2002). Cross-isentropic by definition is a diabatic and importantly irreversible process, which relates to our key message with regard to gravity waves.

**Comment Page 1 Line 5:** remove the comma after “shows”

20 **Reply to comment:** We removed it.

**Changes in manuscript:** A detailed analysis of the observed wind components shows; that both flight legs were affected by vertically propagating gravity waves with momentum deposition and energy dissipation between the two legs.

25

**Comment Page 1 Line 8:** Clarify the quantity of the referenced tracer gradient (I believe you refer to a cross-isentropic gradient of tracer concentration, but this isn't specified)

30 **Reply to comment:** We clarified it accordingly.

**Changes in manuscript:** For the stratospheric data we identified mixing leading to a change of the cross-isentropic tracer gradient of  $N_2O$  from the upstream to the downstream region of the Southern Alps.

35 **Comment Page 1 Line 10:** please define theta as potential temperature when the variable is first used

**Reply to comment:** Changed as suggested.

40 **Changes in manuscript:** Based on the quasi-inert tracer  $N_2O$  we identified two distinct layers in the stratosphere we identified two distinct layers in the stratosphere with different chemical composition on different isentropes as given by constant potential temperature  $\Theta$ .

**Comment Page 1 Line 18:** comma after “N2O”

45

**Reply to comment:** We added it.

**Changes in manuscript:** The  $N_2O$ - $\Theta$ -relation downwind the Alps modified by the gravity wave activity provides clear evidence that trace gas fluxes, which were deduced from wavelet co-spectra of vertical wind and  $N_2O$ , are at least in part

cross-isentropic.

---

**Comment Page 1 Line 22:** clarify that these “irreversible diabatic” trace gas fluxes are cross-isentropic to be consistent with the terminology introduced in line 1 and used throughout.

**Reply to comment:** We clarified it.

**Comment Page 1 Line 23:** Define UTLS in its first use in the text

**Reply to comment:** We changed it.

**Changes in manuscript:** This finally leads to irreversible ~~diabatic~~ (i.e. ~~diabatic~~) trace gas fluxes ~~across isentropes~~ and thus has a persistent effect on the ~~UTLS upper troposphere/lower stratosphere (UTLS)~~ trace gas composition.

---

**Comment Page 2 Lines 8, 14-15, 28-31:** See General Comment 1 regarding consistent terminology and word order

**Reply to comment:** According to the general comment above we added an explanation, which will provide our use of the terms cross-isentropic, diabatic and mixing and our intention of their use.

**Changes in manuscript:** We added the following sentence: ~~We will use the term ‘cross-isentropic’ to emphasize the irreversible (entropy changing and therefore diabatic) nature of this process. Further the term ‘cross-isentropic’ allows to distinguish from ‘quasi-isentropic mixing’.~~ The latter is driven by synoptic and planetary waves leading to stirring and mixing best approximated along isentropes.

~~Diabatic processes lead to an irreversible redistribution of tracers, which must be therefore cross-isentropic providing a tracer flux crossing isentropes.~~

We modified the sentence: Direct observations of gravity wave induced ~~vertical~~ cross-isentropic ~~transport~~ mixing are sparse, since

---

**Comment Page 2 Line 6:** Define UTLS in abstract on page 1, in which case the definition is not needed here

**Reply to comment:** We adjusted it.

**Changes in manuscript:** However, in the ~~upper troposphere/lower stratosphere (UTLS)~~ UTLS observations of gravity waves from aircraft and balloon soundings are essential for process studies beyond the resolution of satellites

---

**Comment Page 2 Line 8:** Change “They” to “Gravity Waves”. Due to complexity of general sentence structure, the manuscript will be clearer if sentences that start with a pronoun (it/this/that/these/those) referring to something from a previous sentence are changed to instead state the referenced topic from the previous sentence/paragraph explicitly.

**Reply to comment:** Changed as suggested.

**Changes in manuscript:** ~~They~~ Gravity Waves propagate across the UTLS where static stability increases at the tropopause

---

**Comment Page 2 Line 11:** Change “Both” to “Both types of instabilities” for clarity - see previous comment.

**Reply to comment:** Changed as suggested.

**Changes in manuscript:** ~~Both~~ Both types of instabilities may lead to the occurrence of turbulence, particularly when wave  
5 breaking occurs with potential subsequent mixing of trace species

---

**Comment Page 2 Line 15:** Comma after “barrier”

10 **Reply to comment:** We added it.

**Changes in manuscript:** The tropopause as a central feature of the UTLS acts as a dynamical barrier, for transport of species  
and the formation of trace gas gradients at the tropopause

15 **Comment Page 2 Lines 15, 17 and 18:** clarify the text to make it clear that “cross-isentropic mixing” (17) and “irreversible  
trace gas exchange” (18) are the required diabatic processes referred to in line 15.

**Reply to comment:**

20 We added a clarification to the manuscript. See comment p.2 1.8, 1.14-15, 1.28-31 above

---

**Comment Page 2 Line 16:** commas after “addition” and “occurrence”

25 **Reply to comment:** We added the commas.

**Changes in manuscript:** In addition, turbulence occurrence, associated with wind shear above the tropopause

---

30 **Comments Page 2 Line 25:** comma after “fold”

**Comments Page 2 Line 25:** remove “occurrence”

**Reply to comment:** Changed as suggested.

35 **Changes in manuscript:** Based on airborne observations in a tropopause fold, Shapiro (1980) identified ozone and parti-  
cle fluxes in regions of turbulence ~~occurrence~~ and shear.

---

40 **Comment Page 3 Line 7:** Remove “steps in here to”

**Reply to comment:** Changed it accordingly.

**Changes in manuscript:** This study ~~steps in here to~~ provides evidence on the basis of observed passive tracers

45

---

**Comments Page 3 Line 8:** remove “will”

**Comments Page 3 Line 9:** remove “non-local”, as it is already clear from the text that the location downwind of the tur-

bulent mixing region is non-local to the turbulence.

**Comments Page 3 Line 9:** change “downwind” to “downwind of”

5 **Reply to comment:** Changed as suggested.

**Changes in manuscript:** We ~~will~~ investigate how orographic gravity wave induced turbulence leads to a ~~non-local~~ persistent effect on the UTLS composition downwind of the turbulent mixing region.

10 **Comment Page 3 Line 23:** change “and covered” to “that covered”

**Comment Page 3 Line 23-24:** change “upper troposphere lower stratosphere” to UTLS

15 **Comment Page 3 Line 23:** change “providing” to “and provided” - 80 km altitudes are outside of the UTLS region.

**Reply to comment:** Changed as suggested.

20 **Changes in manuscript:** Airborne measurements were carried out from Christchurch during June and July 2014 ~~and that~~ covered the ~~upper-troposphere-and-the-lower-stratosphere~~ UTLS ~~providing and provided~~ remote sensing data up to 80 km.

**Comment Page 3 Line 26:** Was there a corresponding HIAPER flight for the Falcon flight for this case study on 12 July? Later statements in the text say the FALCON flight legs were too short to measure the longer gravity wave horizontal wavelength and that two aircraft flying at close altitudes are required to calculate the flux divergence. Many of the coordinated flights in DEEPWAVE using both aircraft had HIAPER flying higher/longer legs near to where the FALCON was flying. Was this the case on 12 July, and if so, could these statements in the text be addressed by looking at HIAPER data from corresponding legs? If there was no corresponding HIAPER flight, please clarify this in the text and also state explicitly that all observations used for this flight are from instruments on the FALCON (and not HIAPER) aircraft-this is never stated in the text.

30 **Reply to comment:** There were no flights performed on 12 July with the HIAPER aircraft. The Falcon campaign was framed by HIAPER on 11 July and 13 July. Further there was no trace gas payload installed on the HIAPER aircraft, which could be compared to our tracer data.

35 **Changes in manuscript:** The two aircraft partly performed coordinated flights in the tropopause region to study the propagation and potential dissipation of gravity waves in this region. ~~During the 12. July, which is the day of the analysis in this paper no HIAPER flight was performed.~~

40 **Comment Page 3 Line 30:** change “(2015).” to “(2015) onboard the DLR Falcon.” See previous comment.

**Reply to comment:** We changed it accordingly.

45 **Changes in manuscript:** Tracer measurements of N<sub>2</sub>O and CO were performed using the ‘University Mainz Quantum Cascade Absorption Spectrometer (UMAQS, Müller et al., 2015) ~~onboard the DLR Falcon~~’.

**Comment Page 4 Line 1:** change “CO” to “CO concentrations” to clarify what quantity this instrument measures for N<sub>2</sub>O and CO

**Reply to comment:** The instrument measures the absorption of Infrared radiation by the absorber density and thus a quantity scaling with the concentration. This concentration is converted to volume mixing ratios using pressure and temperature in the measurement cell. Unlike the concentration, the volume mixing ratio is conserved under pressure changes. Generally volume mixing ratios (or shortly referred to as mixing ratios) are reported for tracer transport studies given in parts per billion by volume (ppbv) corresponding to nanomole per mole in SI-units.

**Changes in manuscript:** The instrument is capable of simultaneously measuring the species  $\text{N}_2\text{O}$  and CO reported here as volume mixing ratios in ppbv with a temporal resolution of 10 Hz

**Comment Page 4 Line 4:** Define sigma in this context-I believe it is the standard deviation in this case.

**Reply to comment:** Correct. We changed it accordingly.

**Changes in manuscript:** is on the order of 0.05 ppbv (1 standard deviation  $\sigma$ ) for  $\text{N}_2\text{O}$  and CO, respectively.

**Comment Section 2.3:** It is not always clear in your figures which data is from ECMWF and which data is from the aircraft - please distinguish your data sources in figures containing a mixture of model data and observational data.

**Reply to comment:** We modified the captions of the Figures accordingly to clarify this.

**Changes in manuscript:** We changed the respective captions (see Figs. 1, 2 (*former Figs. 2, 3*)).

**Comment Page 4 Line 21:** Is the “5% significance level” referenced in wavelet figure captions the same as the “95% confidence level” stated in the text? If so, please use consistent terminology or define the 5% significance level in the main body of the text.

**Reply to comment:** The significance at the 5% level is equivalent to the 95% confidence level

**Changes in manuscript:** To reveal periods with significant wavelet power we determined the 95% confidence level (which is equivalent to the 5% significant level) in the respective analyses below as described in Torrence and Compo (1998).

**Comment Page 4 Line 22:** To be consistent with your use of American English spellings of words such as “color” rather than “colour”, use “analyze” in place of “analyse”

**Reply to comment:** The words vapour, analyse, colour, grey, behaviour are changed to American English.

**Comment Figure 1:** Figure 1 is not utilized in the text and may be unnecessary. The flightpath is shown already in Figure 2, and arrows could be added to indicate flight direction in that figure. The text discussion of the tropopause height also does not refer to Figure 1 - it only references the red line in Figure 2b on Page 6, and the discussion of the “approaching upper level trough” references Gisinger et al (2017) rather than Figure 1. Please provide more direct references that utilize Figure 1 to justify its inclusion in the text.

**Reply to comment:** We removed Figure 1 and included the wind information to former Figure 2.

**Comment Figure 2:** Figure 2 In panel b, consider adding gray shading of the flight sections that are later used for detailed analysis to make it easier to see which part of the ECMWF modeled wave response is sampled in the regions of interest in Figure 3.

**Reply to comment:** We added red boxes framing the respective regions.

**Changes in manuscript:** see added figure

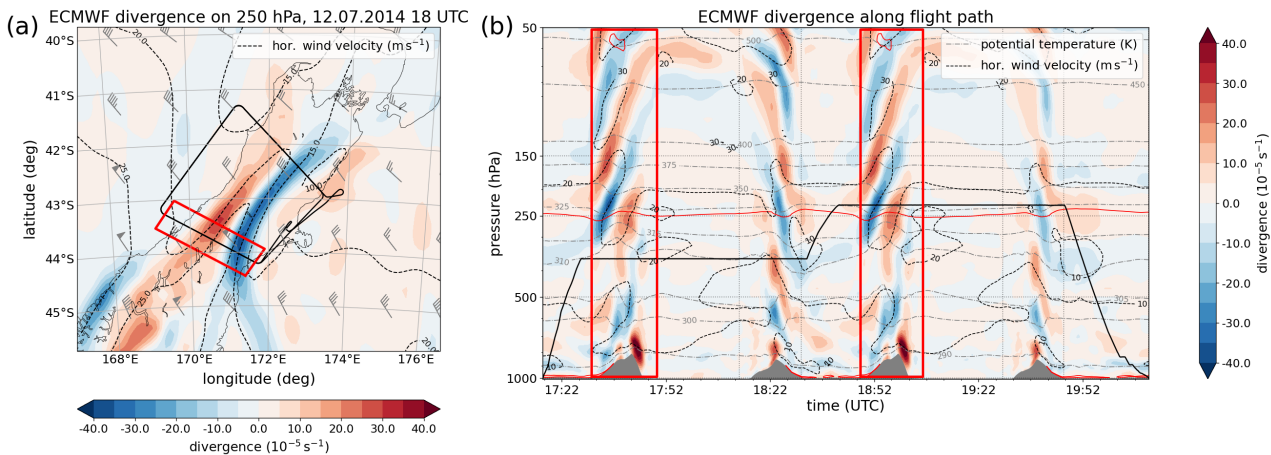

**Comment Figure 2 Caption:** change “horizontal” to “ECMWF horizontal” to clarify the data source

**Comment Figure 2 Caption:** change both instances of “denotes” to “denote” - the subject (“lines”) is plural in both cases.

**Reply to comment:** Changed as suggested.

**Changes in manuscript:** Divergence of the ECMWF horizontal wind during the time of flight a) at 250 hPa and b) as vertical cross section along the flight track indicating the signature of gravity waves over the Southern Alps. The solid red line denote the -2 pVU isoline, the black dashed lines denotes denote contours of the horizontal wind velocity (10, 15, 20, 25  $m s^{-1}$  in a) and 10, 20, 30  $m s^{-1}$  in b)) and the gray dashed lines in b) denotes denote contours of potential temperature.

**Comment Page 6 Line 8:** There is no panel (e) in Figure 2 - please clarify this reference.

**Reply to comment:** Figure 2e in Gisinger et al. 2017. Clarified in the text.

**Changes in manuscript:** According to Gisinger et al. (2017) the synoptic situation can be characterized by a trough located west of New Zealand with a weak surface low south of the Islands causing northwesterly winds in the troposphere (TNW regime, their Fig. 2e Figure 2e in Gisinger et al. (2017)).

**Comment Page 6 Line 13:** change “South Island” to “the South Island”



**Reply to comment:** We changed it accordingly.

5 **Changes in manuscript:** These conditions led to the excitation of mountain waves and generated varying and moderate gravity wave responses over [the](#) South Island

---

**Comment Page 6 Line 13:** change “horizontal” to “ECMWF horizontal” to explicitly state the data source.

10 **Reply to comment:** Changed as suggested.

**Changes in manuscript:** Fig. 1a (*former Fig. 2a*) shows the divergence of the [ECMWF](#) horizontal wind at 250 hPa at 18:00 UTC

15 **Comment Figure 3 Caption:** Does analyzed PV come from ECMWF? If so, please state this explicitly in the caption.

**Comment Figure 3 Caption:** change “potential vorticity” to “potential vorticity (PV)” to link with figure labels.

20 **Comment Figure 3 Caption:** Clarify what quantity of N<sub>2</sub>O and CO is plotted. The units in the plot seem to indicate that these are concentrations, yet the text refers to the N<sub>2</sub>O line as the mixing ratio (line 10), making the quantity that is plotted in the figure ambiguous. See General Comments above regarding the use of consistent terminology.

**Reply to comment:** Correct, PV also comes from ECMWF. We clarified it.

25 **Changes in manuscript:** Time series of a) potential temperature  $\Theta$  from the measurements (black), altitude (blue) above surface elevation (filled blue), b) vertical wind (black), horizontal wind (blue), c) N<sub>2</sub>O (blue) and CO (black) [volume mixing ratios](#) and d) [ECMWF](#) potential vorticity [PV](#) interpolated along the flight track.

30 **Comment Page 8 Line 2:**  $\theta$  should be defined as potential temperature much earlier in the text, not here.

**Reply to comment:** Changed as suggested.

35 **Changes in manuscript:** The fluctuations of ~~potential temperature~~  $\Theta$  reached an amplitude

---

**Comment Page 8 Figure 4:** label the upper leg and lower leg panels on the right side of the plots

40 **Reply to comment:** We changed the Figure and added respective labels.

**Changes in manuscript:** see added figure

45 **Comment Figure 4 Caption:** State in the caption that the data plotted from the upper leg and lower leg corresponds to the shaded regions of Figure 3.

**Comment Figure 4 Caption:** From the text (Page 7 Line 17) and the tropopause height in Figure 2, the upper leg is “just above the tropopause”, whereas the lower leg is farther from the tropopause and shouldn’t be labeled as “just below the tropopause”.

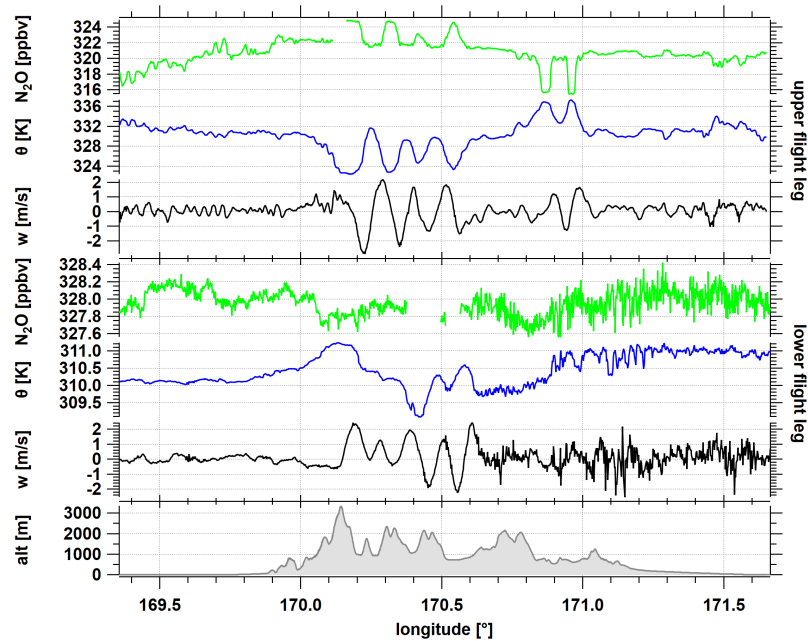

If anything, the clarifying statement in the figure caption should indicate that the upper leg is just above the tropopause, as in the text. See General Comments above regarding the use of consistent wording.

**Reply to comment:** Changed as suggested.

**Changes in manuscript:** Cross section of the two southern stacked flight legs crossing the Southern Alps (gray shaded regions of Fig. 2 (former Fig. 3)) showing  $\text{N}_2\text{O}$  (green),  $\Theta$  (blue) and vertical wind  $w$  (black) for the upper leg at 10.9 km (top three panels) and the lower leg at 7.9 km with surface elevation (bottom). Both legs are separated by 75 minutes in time. The upper leg lies in the lower stratosphere just above the tropopause, the lower leg lies in the upper troposphere just below the tropopause.

**Comment Page 9 Line 3:** remove “,which has a lifetime of 110 years in the lower stratosphere,” - this lifetime information is restated later in the text where it is relevant to the discussion, but it is not important to state this information a second time in this location.

**Reply to comment:** We removed it.

**Changes in manuscript:** The passive tracer nitrous oxide  $\text{N}_2\text{O}$ , which has a lifetime of 110 years in the lower stratosphere, indicates corresponding fluctuations at the upper level in the stratosphere.

**Comment Page 9 Line 7:** Consider replacing “such a breakdown of scales” with “such turbulence” to unambiguously refer to the “occurrence of turbulence” mentioned in the previous sentence. See General Comments above regarding the use of consistent wording.

**Reply to comment:** Replaced as suggested.

**Comment Page 9 Line 7:** Maybe state more clearly in the text that you identify a kinematic flux of N<sub>2</sub>O by collocated, phase-shifted fluctuations of theta and w indicating a nonzero  $w'\theta'$  that has corresponding fluctuations in N<sub>2</sub>O concentrations.

**Reply to comment:** At this point we only want to indicate, that the time series indicate the potential for emerging kinematic fluxes without proving this at this point quantitatively.

**Changes in manuscript:** At the upper level such ~~a breakdown of scales~~ turbulence is not prominent, although the fluctuations of  $\Theta$ ,  $w$  and N<sub>2</sub>O (Fig. 3 (*former Fig. 4*)) are indicative ~~for~~ of at least a potential kinematic flux of N<sub>2</sub>O, ~~but~~ with only weakly pronounced small scale variability of  $w'$ .

**Comment Page 9 Lines 11-13:** Change word order to “The vertical turbulent kinetic energy was larger in the lower leg ( $\overline{w'^2} = 0.70 \text{ m}^2 \text{ s}^{-2}$ ) than in the upper leg ( $\overline{w'^2} = 0.53 \text{ m}^2 \text{ s}^{-2}$ ), where the overline denotes the average over the whole 200 km flight leg.” This will make the sentence less confusing.

**Reply to comment:** We changed the sentence as suggested.

**Changes in manuscript:** ~~For the lower leg higher values for the vertical turbulent kinetic energy occurred (as given by the squared variance of the vertical wind  $\overline{w'^2} = 0.70 \text{ m}^2 \text{ s}^{-2}$  the overline denotes the average over the whole 200 km long flight leg) compared to the upper leg ( $\overline{w'^2} = 0.53 \text{ m}^2 \text{ s}^{-2}$ ).~~ The vertical turbulent kinetic energy was larger in the lower leg ( $\overline{w'^2} = 0.70 \text{ m}^2 \text{ s}^{-2}$ ) than in the upper leg ( $\overline{w'^2} = 0.53 \text{ m}^2 \text{ s}^{-2}$ ), where the overline denotes the average over the whole 200 km flight leg.

**Comment Page 9 Line 14:** Does “this energy” refer to the energy in the lower leg or the energy in the upper leg? Please state explicitly which leg is referenced here. See General Comments above regarding unclear use of pronouns referring to previous sentences.

**Reply to comment:** “this energy” refers to the lower leg. We changed it accordingly.

**Changes in manuscript:** However, ~~this~~ the energy of the lower leg seems to reside in scales smaller than about 1 km

**Comment Page 10 Line 5:** Was there a corresponding HIAPER flight with longer legs that could identify the longer gravity wave horizontal wavelengths? Clarify earlier in the text whether both aircraft were flying, and if there is corresponding HIAPER data, perhaps it is worth checking to see if the longer wavelength can be identified.

**Reply to comment:** As mentioned in a previous comment above no HIAPER flights took place at this date.

**Comment Page 10 Line 10:** Reference Table 1 values in the text where you mention the zonal momentum fluxes

**Reply to comment:** True. Changed it accordingly.

**Changes in manuscript:** The specific zonal momentum fluxes  $\overline{u'w'}$  (Tab. 1) are negative above the mountains

**Comment Page 10 Line 15:** I believe that the vertical derivative is taken by comparing values from the two flight legs at different altitudes, right? Or is the estimate from ECMWF? Perhaps clarify how this value is estimated - it is confusing to say you take a vertical derivative from flight legs that only sample horizontally unless more information is provided.

5 **Reply to comment:** The vertical derivative is taken by comparing values from the two flight legs.

**Changes in manuscript:** An estimate of the vertical momentum flux divergence [based on the values from the stacked flight legs](#)

10 **Comment Page 10 Line 19:** Clarify in the text that you are referring back to wind components that are plotted back in Figure 3 and/or Figure 4.

**Reply to comment:** Changed as suggested.

15 **Changes in manuscript:** This argument is supported by the small-scale signatures found in all wind components downstream of the coherent waves in the lower leg ([see Fig. 2 and Fig. 3 \(former Fig. 3 and 4\)](#)).

20 **Comment Figure 6:** The use of similar colors for different variables makes it more difficult to explain and distinguish which variables are plotted. It would be more effective to use different colors (instead of 3 shades of gray/black) and add a legend to the plot identifying each plotted variable color.

**Reply to comment:** For a better identifiability the data points from the lower flight leg are now in orange.

25 **Changes in manuscript:** see added figure

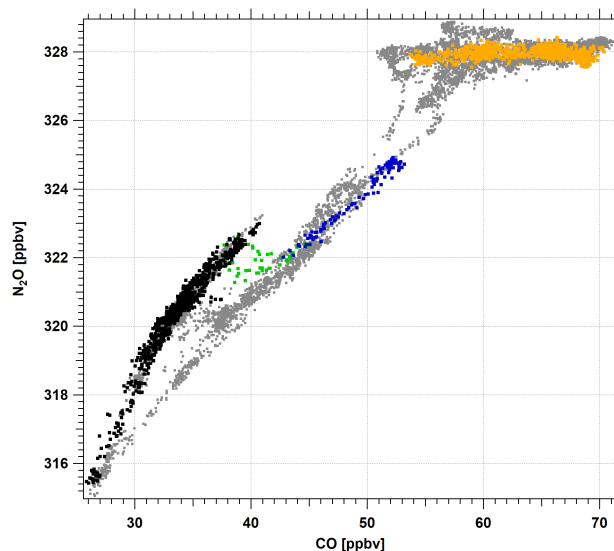

**Comment Figure 6 Caption:** It is unclear which datapoints are “colored data points” since all datapoints are colored. Does this sentence refer to all the datapoints in the figure or a specific subset?

**Reply to comment:** We changed it accordingly.

**Changes in manuscript:** ~~Colored~~ Black, blue and green data points denote the upper south-western flight leg from 18:48 UTC to 19:06 UTC

The lower leg lies entirely in the troposphere as indicated by the ~~dark-gray~~ orange data points of  $N_2O = 328$  ppbv.

---

**Comment Page 12 Lines 4-5:** replace “The orographic waves at the lower leg” with “ $N_2O$  concentrations in the lower leg (black) to clarify that you’re referring to the  $N_2O$  concentration in the plot

**Reply to comment:** Replaced as suggested.

**Changes in manuscript:** The orographic waves at the lower leg appear at almost constant  $N_2O$ -~~levels~~ volume mixing ratios of 328 ppbv.

---

**Comment Page 12 Line 11:** “ $N_2O$  mixing ratios”: Perhaps you should identify and show fits of these mixing ratios in the plot, as people from outside the field may not understand that you refer to regions of near-constant ratios between concentrations of  $N_2O$  and  $CO$  as “mixing ratios” when the term is not defined or plotted explicitly. You could also clarify that “ $N_2O$  mixing ratio” is the ratio between  $N_2O$  and  $CO$ , otherwise it is unclear why you don’t refer to it is the “ $CO$  mixing ratio” or the “ $N_2O:CO$  mixing ratio”.

**Reply to comment:** We thank the reviewer for this point since it reflects the importance of a exact language and wording to facilitate understanding across different communities. As stated above (and included now in the manuscript referring to the reviewer comment to p.4, l.1) we clarified the term "mixing ratio". Generally the term mixing ratio (or more correct "volume mixing ratio") refers to the abundance of a gaseous species by reporting its volume mole fraction (in nanomole per mole or ppbv). It has nothing to do with a ratio of two species. This may indeed lead to confusion when comparing to different species. We therefore changed the wording throughout the manuscript.

**Changes in manuscript:** We changed the term "mixing ratio" to "volume mixing ratio" throughout the manuscript.

---

**Comment Page 12 Line 11:** your “detailed analysis” is not shown - please provide more information on how these two temperature ranges were identified and what their physical significance (if any) is.

**Reply to comment:** The corresponding analysis is linking former Fig. 6 and former Fig. 7. The time series of the potential temperature was colorized in former Fig. 7 corresponding to former Fig.6 to show the spatial and temporal distribution of data points, which allows to identify three layers

**Changes in manuscript:** A detailed analysis (see Fig. 7 (former Fig. 6)) shows that the two branches of the correlation can be assigned to two distinct potential temperature intervals

---

**Comment Page 12 Line 13:** What is a “compact relation”?

**Reply to comment:** Compact is indeed a qualitative description describing the less scattered data populations with a high data density and small scatter variability. However, it is well known that different air masses in the stratosphere show distinct correlations between different tracers (e.g. Plumb, 2007; Hoor et al., 2002), which can be used to identify a mixture of compo-

sition of the respective air masses.

**Changes in manuscript:** Notably, the data points (marked in green) which fall inbetween the two relations (and thus isentropes as given above) connect both air masses data clouds ( $\text{N}_2\text{O} < 324$  ppbv) forming two compact branches

5

---

**Comment Page 12 Line 14:** Please explain how the “compact relations” are given above.

**Reply to comment:** In Fig. 6 (*former Fig. 7*) the  $\text{N}_2\text{O}$ -CO correlation has two compact branches in the stratosphere where the distribution of data points in the scatter plot show a small variability, i.e. the slope of each branch has high coefficient of determination.

---

**Comment Page 12 Line 17:** comma after “context”

15

**Reply to comment:** Added.

**Changes in manuscript:** the tracer-tracer data of the scatter plot in a geophysical and meteorological context, Fig. 6 (*former Fig. 7*) shows the time series of potential temperature

20

---

**Comment Page 12 Line 20:** change inbetween to “between”, here and elsewhere in the text

**Reply to comment:** Changed here and elsewhere.

25

**Changes in manuscript:** Notably those points which indicate mixing in the tracer-tracer scatter plot fall inbetween the distinct layers.

---

**Comment Page 12 Line 28:** change “vertically closely stacked levels” to “closely stacked vertical levels”

30

**Comment Page 12 Line 29:** change “can not” to “cannot”

**Comment Page 12 Line 29:** Clarify earlier in the text whether there was one or two aircraft flying on 12 July.

35

**Reply to comment:** Changed and clarified as suggested.

**Changes in manuscript:** However, this would require simultaneous measurements of the tracer of interest on two vertically closely stacked levels closely stacked vertical levels, which can not cannot be accomplished with one aircraft (as was the case here).

40

---

**Comment Page 12 Line 30:** change “km potential” to “km, the potential”

**Comment Page 12 Line 31:** change “levels” to “flight levels”

45

**Reply to comment:** Changed as suggested.

**Changes in manuscript:** However, due to the large vertical spacing of 3 km, the potential influence from large scale hori-

zontal advection could strongly impact the flux divergence estimates between the two [flight](#) levels.

---

**Comment Figure 7 Caption:** fix the broken figure reference “Fig. ??”

**Reply to comment:** The figure reference was repaired.

**Changes in manuscript:** Colors indicate two different layers of air masses (black, blue) and a mixed layer ~~in~~between (green) corresponding to Fig. ~~??~~ 5 (*former Fig. 6*).

---

**Comment Page 13 Line 1:** It should be stated much earlier in the text that cross-isentropic fluxes are diabatic. 1 and onward: the text refers to species gradients as  $d(X)/d(\theta)$ , yet the plotted gradient in Figure 11 appears to be inverted as  $d(\theta)/d(X)$ . Because the text indicates that the tracer slope changes as a function of  $\theta$  (instead of saying the  $\theta$  slope changes as a function of the tracer), it would be much clearer to plot  $d(X)/d(\theta)$  rather than  $d(\theta)/d(X)$ .

**Reply to comment:** As stated above, we want to just use one way of calculating the ratio between  $\Theta$  and  $N_2O$ . In Fig. 8 (*former Fig. 9*) we use  $\Theta$  as the vertical coordinate and the tracer on the x-axis. We added the following text, which states, that we will use only one convention as explained above to just use one way of expressing the ratio to be fully consistent with Fig. 7 and Fig. 8 in the revised manuscript (*former Fig. 8 and Fig. 9*).

**Changes to manuscript:** Note that we will use in the following the inverse relation  $\partial\Theta/\partial N_2O$  to be mathematically be consistent with the profiles shown in Fig. 7 and in Fig. 6 (*former Fig. 8 and Fig. 7*). We will consequently apply this convention with  $\Theta$  in the numerator and  $N_2O$  in the denominator throughout the paper and will keep the same convention for any analysis which follows below.

---

**Comment Page 13 Line 7:** Perhaps use the wording “cross-isentropic” somewhere in this description to refer back to the title and previously used terminology. See General Comments above regarding the use of consistent wording.

**Reply to comment:** We changed the sentence.

**Changes in manuscript:** We therefore investigated if tracer gradients with respect to potential temperature  $\Theta$  were changed due to the occurrence of gravity wave induced ~~turbulent mixing~~ turbulence leading to cross-isentropic mixing by comparing local tracer profiles upstream and downstream the mountains

---

**Comment Page 13 Line 8:** perhaps say “above the tropopause” instead of “at the tropopause” since your measurements are not directly at the tropopause. Figure 8 only shows a diagram of this relationship above the tropopause, so using the same terminology in the text will make it clearer.

**Reply to comment:** We clarified the statement since we want to point out the general properties of  $N_2O$  at this point.

**Changes in manuscript:** Since  $N_2O$  ~~at the tropopause in the lowermost stratosphere~~ is not affected by local chemistry it is purely under dynamical control

---

**Comment Page 13 Line 9:** Your “hypothesis” is difficult to parse from the text due to complex sentence structure - please modify lines 5-7 to more clearly indicate your prediction refers only to the cause of the observed changes to  $d(X)/d(\theta)$

(gravity wave induced turbulent mixing). Otherwise your hypothesis could be misidentified as just saying that  $d(X)/d(\theta)$  changes, which we know already from the data, vs your actual hypothesis of why  $d(X)/d(\theta)$  changes.

**Reply to comment:** We have changed sentences in lines 5-7 (see above) and also changed the text of our hypothesis.

**Changes in manuscript:** In particular, the gradient **change** of the conservative tracer  $N_2O$  at the tropopause is perfectly suited to test our hypothesis **that gravity wave-induced turbulence lead to cross-isentropic mixing**. Since  $N_2O$  **in the lowermost stratosphere at the tropopause** is not affected by **local** chemistry it is purely under dynamical control.

**Comment Page 13 Lines 9-10:** Change “at the tropopause” to “just above the tropopause” since the data you present in Figure 7 is “just above the tropopause” according to the figure caption.

**Reply to comment:** Here we refer to the gradient change of  $N_2O$  at the tropopause as general property of  $N_2O$  and changed the text as given above.

**Comment Figure 8:** Since your discussion in the text refers to  $d(X)/d(\theta)$ , perhaps it would be better to have your diagram in Figure 8 be a diagram of  $d(X)/d(\theta)$  vs.  $\theta$  or altitude instead of making the reader infer changes to  $d(X)/d(\theta)$  from a  $\theta$  vs  $N_2O$  plot. You could then compare this diagram with Figure 11 instead of with Figure 9.

**Reply to comment:** We are interested in the scales which are involved to change of the  $\Theta$ - $N_2O$ -relationship. A diagram of e.g. the ratio of two quantities as a function of altitude,  $\Theta$  would not bring up the information, which we want to extract - namely the change of the ratio (i.e. the slope) as function of scales.

**Comment Page 14 Line 1:** Change “This is schematically shown” to “A schematic of our hypothesized changes to  $d(X)/d(\theta)$  is shown”. See General Comment above regarding unspecific use of pronouns at the beginning of sentences.

**Reply to comment:** Changed as suggested.

**Changes in manuscript:** ~~This is schematically~~ **A schematic of our hypothesized changes of  $N_2O$  to  $\Theta$**  is shown in Fig. 7 (former Fig. 8), ~~which~~ shows the evolution of the  $N_2O$ - $\Theta$  profile

**Comment Page 14 Line 9:** The use of the word “steeper” is confusing in this case - due to the orientation of the axes in Figure 8, the downstream slope looks “steeper” to the eye than the upstream slope because the plot is oriented to show the dependent variable ( $\theta$ ) on the y axis rather than the x axis. To avoid confusion, it would be clearer to say the gradient  $d(X)/d(\theta)$  is larger upstream. As suggested above, this would be easier to see visually if the diagram in Figure 8 shows  $d(X)/d(\theta)$  vs  $\theta$  or altitude rather than  $\theta$  vs  $N_2O$ .

**Reply to comment:** Indeed these qualitative expressions should be avoided. We therefore changed the text as below.

**Comment Page 14 Line 10:** Though it follows from the text, it may be good to state explicitly that the vertical gradient decreases due to mixing, rather than just stating that the gradient is higher upstream than downstream.

**Reply to comment:** According to the change related to the preceding comment we clarified the statement.

**Changes in manuscript:** Thus, in case of gravity wave induced turbulent mixing during flight FF09, we expect a **steeper**



vertical  $N_2O$ - $\Theta$  gradient in the inflow region upwind the mountains (i.e. a smaller  $\Theta' / N_2O'$  ratio) than at the downstream side of the mountain ridge more rapid decrease of  $N_2O$  with increasing  $\Theta$  in the inflow region upwind the mountains than at the downstream side of the mountain ridge as an effect of turbulent mixing. The ratio of  $\Theta' / N_2O'$  therefore increases from upstream to downstream due to turbulent mixing.

5

**Comment Figure 9:** maybe zoom in on the region from 320 K - 340 K to make it easier to see the changing  $N_2O$  vs theta relationship.

- 10 **Reply to comment:** We changed the axis scale starting from 308 K so that the data points from the lower flight leg and the chemical tropopause are included as well.

**Changes in manuscript:** Modified figure.

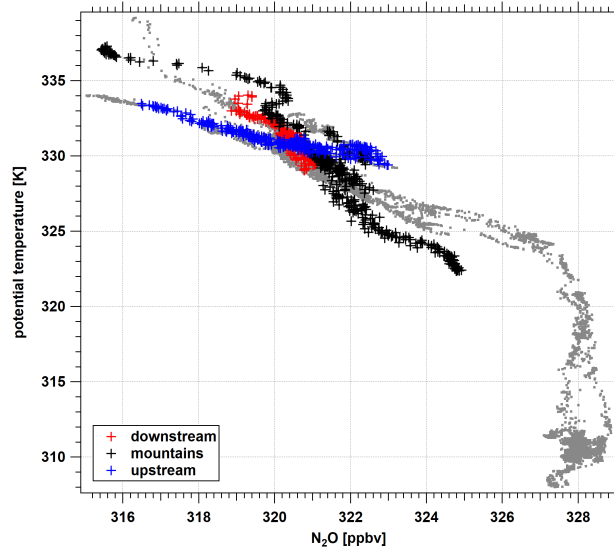

15

**Comment Page 15 Line 4:** change “corresponding to the hypothesis described above” to “consistent with our hypothesis that  $d(X)/d(\theta)$  will be reduced in regions impacted by gravity wave induced mixing”. See General Comments above regarding the use of consistent wording.

- 20 **Reply to comment:** Changed as suggested.

**Changes in manuscript:** As evident from Fig. 8 (former Fig. 9) different slopes of  $N_2O$  versus  $\Theta$  appear on the upstream side, downstream side and above the mountains ~~corresponding to the hypothesis described above~~ consistent with our hypothesis that the vertical gradient (with respect to  $\Theta$ )  $(\partial N_2O / \partial \Theta)$  (and mathematically correct with regard to Fig. 8 (former Fig. 9)  $(\partial N_2O / \partial \Theta)^{-1}$ ) will be changed in regions impacted by gravity wave induced mixing.

25

**Comment Page 15 Line 5:** As stated above, please clarify what is meant by a “compact relationship”

**Reply to comment:** We changed the sentence.

**Changes in manuscript:** The  $N_2O$ - $\Theta$ -~~slope relation~~ on the upstream side shows a strong decrease of  $N_2O$  with potential temperature  $\Theta$  and a compact relationship (i.e. a well defined relationship exhibiting only weak scatter).

**Comment Page 16 Lines 7-8:** remove “as given in detail further below”

**Comment Page 16 Line 9:** after “different scales”, add “using the formula”

**Reply to comment:** Changed as suggested.

**Changes in manuscript:** ~~As given in detail further below, we analysed~~ We analyzed the data for different averaging periods to account for varying perturbation wave lengths and to ~~analyse~~ analyze the effect at different scales using the formula:

**Comment Page 16 Line 15:** Perhaps it would be valuable to explain why the slope  $d(N_2O)/d(\theta)$  decreases due to mixing, as up to this point the only “explanation” is that the slope will change, not how it will change or why.

**Reply to comment:** The explanation is provided in the discussion of the scheme in former Fig. 8. Mixing between two different air masses will change the gradients of  $N_2O$  and  $\Theta$  particularly in regions at the tropopause, where the gradients of both quantities change.

**Comment Page 17 Line 4:** Why are wavelengths of 33 km and 4 km selected for Figure 10? Why not show averaging periods corresponding to the spectral peaks in Figure 5 that match the dominant orographic gravity wave frequencies you identified?

**Reply to comment:** In Fig. 9 (former Fig. 10) we want to demonstrate how the ratio  $\Theta'/N_2O'$  change for the three flight segments as a function of averaging time corresponding to a maximum wavelength (i.e. averaging time) to motivate the next figure. The spectral peaks indicate the local dynamics only, while the tracer distribution integrates over the air parcel history.

**Reply to comment:** We added the plots here as suggested. We will however keep the original plots in the manuscript, since they better illustrate the method.

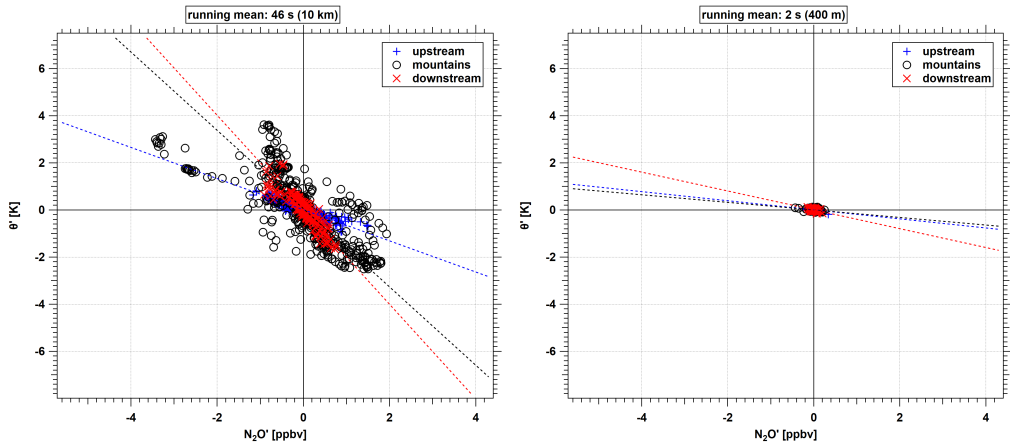

**Comment Figure 11:** Use a clearer label for the y axis than “Slope” (i.e.,  $\partial\Theta/\partial N_2O$ )

**Reply to comment:** We changed the labels and caption to be more consistent throughout the text.

**Changes in manuscript:** Caption of Fig. 10 (former Fig. 11): Scale dependent analysis for different integration times showing the ~~slope between  $N_2O'$  and  $\Theta'$~~  ratio of  $\Theta'/N_2O'$  for different averaging periods (i.e. wavelengths) for upstream (blue), lee (red) and above mountains (black).

**Comment Figure 11:** Because your analysis is focused on spatial scales, please convert the x-axis label to spatial scales (i.e. km) to facilitate more intuitive comparisons with orographic wave scales identified in the text and in Figure 5. This will also make it easier to understand how these scales correspond to the wavelet coherence plotted in Fig. 12 where scales are converted to km.

**Reply to comment:** We changed the labels and added a spatial scale as upper x-axis as suggested.

**Comment Figure 11:** As discussed earlier, why not plot  $d(X)/d(\theta)$  instead of  $d(\theta)/d(X)$ ? This would make it easier to see that the magnitude of  $d(X)/d(\theta)$  is larger upstream like you discussed on pages 13-14.

**Reply to comment:** We want to use just one expression for the ratio based on the profile (Fig. 8, former Fig. 9) as explained before.

The corresponding diagram with  $N_2O'/\Theta'$  is shown here illustrating the transition from the upstream ratio (blue) to the downstream ratio (red) occurring over the mountains (black).

**Changes in manuscript:** see added figure

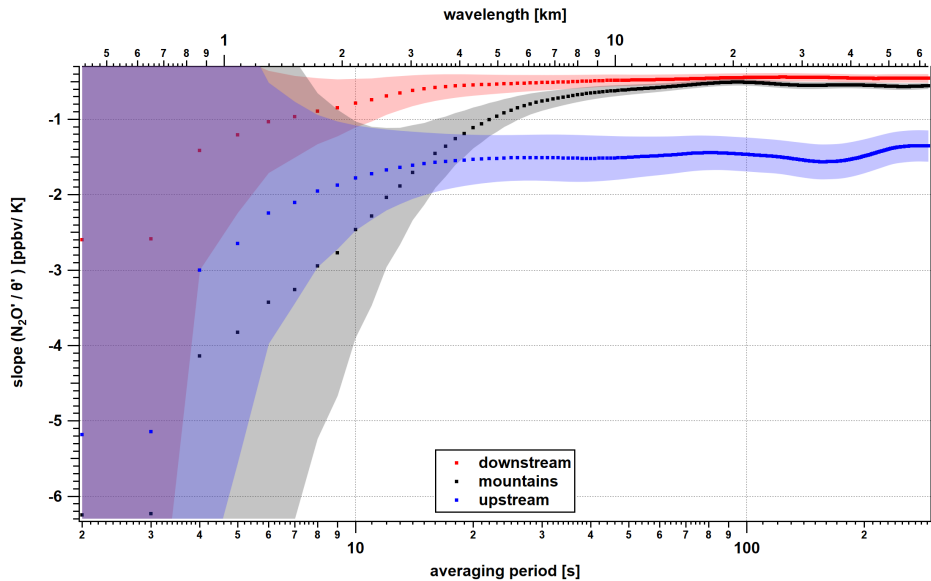

**Comment Page 18 Lines 7-9:** It is confusing to identify the slope behavior at “larger wavelengths” and then refer to these dynamics as “at small scales” in the next sentence, as the greatest downstream slope modulation from the upstream slope occurs for the largest averaging times in the figure (i.e., the largest spatial scales). Please use consistent terminology, as referring to the same scale range as both “larger” and “small” from one sentence to the next is needlessly confusing.

**Reply to comment:** We changed the use of the terms according to the more stringent use of the terminology related to ratios, slopes, etc.

**Changes in manuscript:** The downstream impact is This is evident from the different  $\Theta'/N_2O'$  slope ratio at larger wave lengths at the lee downwind side compared to the upstream slope ratio. The transition between the upstream and downstream ratios occurs at scales <3 km above the mountains. Therefore we conclude that during FF09 mountain waves modified the slope  $N_2O-\Theta$   $\Theta'/N_2O'$  ratio at small scales and induced cross-isentropic turbulent mixing. They induced cross-isentropic turbulent mixing leading finally to changes at large scales downwind the Alps as evident from the ratio  $\Theta'/N_2O'$  and finally the vertical gradient  $\partial N_2O/\partial \Theta$  (Fig. 6 (former Fig. 7)).

**Comment Figure 12 Caption:** please clarify what variable is plotted by the arrows and what it means for N2O and theta to be phase shifted by 180 degrees

**Reply to comment:** The color code indicates the wavelet coherence as given by equation 2 of the manuscript. We added a link to equation (2). The arrows indicate the relative phasing of the  $N_2O$  and  $\Theta$  time series; because of the different vertical gradient of  $N_2O$  (decreasing values) and  $\Theta$  (increasing values) the phase difference between them should be close to  $180^\circ$  (see Fig. 6 (former Fig. 7)).

**Changes in manuscript:** We change the caption: Wavelet coherence of  $N_2O$  and potential temperature (wavelength = period · flight speed (216 m/s), see eqn. 2).

**Comment Figure 12 Caption:** Is the 5% significance level the same as the 95% confidence level discussed earlier in the text? If so, please use the same terminology throughout. See General Comments above regarding the use of consistent wording.

**Reply to comment:** Yes, we changed this for consistency.

**Changes in manuscript:** The solid lines show the 5% significance level 95 % confidence level as given in paragraph 2.4.

**Comment Page 18 Line 12:** Please clarify that this discussion corresponds to Figure 12.

**Reply to comment:** We added it.

**Changes in manuscript:** To identify the leading spatial and temporal scales for the cross-isentropic (i.e. irreversible) mixing of  $N_2O$  we analyzed the wavelet coherence between  $N_2O$  and  $\Theta$  in Fig. 11 (former Fig. 12).

**Comment Page 18 Line 14:** Scales referenced in the text should be converted to km to be easier to identify in Figure 12 where you have converted the temporal scale sampling to km scales.

**Reply to comment:** Correct. We changed it accordingly.

**Changes in manuscript:** co-vary across different time scales from ~~8-80 s~~ 1.7-17.3 km (corresponding to 8-80 s).

- 5 **Comment Page 18 Line 14:** Please clarify what the “phase relation” is, how it is plotted in Figure 12, and what it means to have a phase relation that is constant at 180 degrees.

**Reply to comment:** The phase relation is given by the phase between the oscillating  $N_2O$  and  $\Theta$  as a function of time (e.g. Fig. 6 (*former Fig. 7*)). For opposite vertical altitude gradients of  $N_2O$  and  $\Theta$  the phase must 180°, if no mixing occurs.

10

**Changes in manuscript:** Further, the phase relation ~~is constant at 180°, which one would expect for a decreasing vertical  $N_2O$  gradient in the stratosphere, but increasing  $\Theta$ :~~ between the time series of  $N_2O$  and  $\Theta$  (see Fig. 6 (*former Fig. 7*)) is almost constant at 180° for scales < 20 km, which one would expect for opposing vertical gradients of  $N_2O$  and  $\Theta$  in the stratosphere.

15

**Comment Page 19 Line 1:** Because the phase relation is not explained, it is unclear what it means or how it relates to previous conclusions in the text. In addition, it is unclear which conclusion you are referring to by saying “the conclusion from the previous upwind slope analysis” - please state this conclusion explicitly and explain how it is confirmed by this analysis.

- 20 **Reply to comment:** The sentence of question is a remnant of a previous version. The statement is explained in former p.19, 1.7-14. We removed the sentence.

**Changes in manuscript:** ~~Thus, both findings confirm the conclusion from the previous upwind slope analysis (Fig. 10, upstream side (*former Fig. 11*)).~~

25

**Comment Page 19 Lines 3-14:** Perhaps these lines of text can all be part of the same paragraph rather than having 3 paragraphs discussing the same thing in groups of 1-2 sentences.

- 30 **Reply to comment:** We connected the two paragraphs.

**Comment Page 19 Line 3:** please express “time scales < 40 s” in units of km to make them identifiable in Figure 12

- 35 **Reply to comment:** We added the km-value. Also in other places.

**Changes in manuscript:** there is low coherence with values lower than 0.7 for time scales ~~< 40 s~~ < 8.7 km (< 40 s) accompanied by a breakdown of the phase relation

40

**Comment Page 19 Line 5:** Please explain what feature in Figure 12 indicates a “defined phase transition” and how it is distinct from the rest of the plot (phase transitions are not described in terms of phase shift, which is the only explanation given for the meaning of the arrows in Figure 12)

- 45 **Reply to comment:** We thank the reviewer for this point. ‘transition’ is wrong, ‘relation’ is correct, since a well-defined phase relation appears downstream at short wavelengths as opposed to the mountain regions (for wavelengths < 10 km).

**Changes in manuscript:** On the downstream side (from 171°E) especially at small periods higher coherence values and defined phase ~~transitions appear~~ relations re-establish compared to the above-mountain regime, albeit more variable than at the

upstream side.

---

**Comment Page 19 Line 7:** change “matches roughly” to “roughly matches”

**Reply to comment:** We changed the sentence.

**Changes in manuscript:** ~~This matches roughly the results seen in~~ consistent with Fig. 10 (*former Fig. 11*). ~~In~~ , in upwind regimes with a high coherence

---

**Comment Page 19 Line 8:** change “co-vary. The” to “co-vary: the” - you seem to be explaining what it means to co-vary in the next sentence, which is easier to understand if the sentences are combined.

**Comment Page 19 Line 8:** Is the “calculated slope” from Figure 11? If so, please state this as the text here is talking about Figure 12.

**Reply to comment:** Correct. We changed it accordingly.

**Changes in manuscript:** upwind regimes with a high coherence  $N_2O$  and the potential temperature  $\Theta$  co-vary. ~~The~~ : the phase relation between them remains constant across scales and the calculated slope (*Fig. 11 (former Fig. 12)*) is unchanged too.

---

**Comment Page 19 Line 10:** What is this “new slope relation”? How is it visible in Figure 12? If you are referring back to Figure 11, please say so and quantify this “new slope relation” with a value from the appropriate plot.

**Reply to comment:** The “old slope” is upstream ratio (-0.7 K/ppbv) and the “new ratio” (-2.2 K/ppbv) is the downstream and above mountain ratio from Fig. 10 (*former Fig. 11*) for periods longer than 40 s (> 8.7 km). We also changed "slope relation" to simply "ratio".

**Changes in manuscript:** Downwind a new ~~slope ratio~~ reestablishes as a result of mixing above the mountain ridge, but with a defined phase relation again, but different ~~slope ratios~~.

---

**Comment Page 19 Lines 12-14:** Please provide more detailed explanations in the text from lines 3-11, as I do not follow how this conclusion is supported by the analysis of Figure 12.

**Reply to comment:** We rephrased the sentence.

**Changes in manuscript:** ~~We therefore conclude that for wave periods with low coherence and the breakdown of the phase above the mountains the relationship between  $N_2O$  and  $\Theta$  is the result of gravity wave induced mixing leading to the observed  $N_2O$ - $\Theta$  slope change at the downstream side, where a modified slope establishes.~~ We therefore conclude that for short wave length exhibiting low coherence and the breakdown of the phase above the mountains the gravity waves produced turbulence which lead to cross-isentropic mixing. Therefore, the relationship between  $N_2O$  and  $\Theta$  is the result of gravity wave induced mixing. Since the mixing is cross-isentropic this changed the  $N_2O$ - $\Theta$  slope, which is evident at the downstream side, where a modified slope establishes (compared to the upwind side).

**Comment Figure 13 Caption:** change “colors denotes” to “colors denote”

**Reply to comment:** Changed as suggested.

- 5 **Changes in manuscript:** Red colors denotes a positive flux and blue colors indicate a negative flux.

---

10 **Comment Page 20 Line 1:** is the “cross wavelet transformation” the part of Page 4 line 25 inside {} ? This is the first usage of the term “cross wavelet transformation” as it is not mentioned in section 2.4. See General Comments regarding consistent use of terminology.

**Reply to comment:** The variables inside the brace of equation 1 is called “cross wavelet transformation” and the real part is called “cospectrum of the cross wavelet transformation”. We added the term to p.4

- 15 **Changes in manuscript:** The wavelet cospectrum  $W^{AB}$  of two time series  $A$  and  $B$  with the wavelet transforms  $W^A$  and  $W^B$  is defined as the real part of the cross wavelet transformation

---

20 **Comment Page 20 Line 13:** It is not explained why having a temporal resolution of 10 s precludes the analysis of ozone fluxes - please clarify.

**Reply to comment:** The response time of the ozone instrument TE49 which which was used for the campaign is 10 seconds, so we will not resolve fluxes at shorter scales, which are significant according to  $N_2O$ .

25 **Comment Section 4.3:** Figure 14 and its associated discussion would be easier to understand in the context of the spatial scales plotted in Figures 12 and 13 if Figure 14 was discussed in terms of horizontal scales rather than in terms of temporal frequencies. These scales are included in Figure 14 - please modify the discussion here to include the wavelengths in Figure 14 instead of only referring to the frequencies in Hz.

30 **Reply to comment:** We added time and spatial information to the figures to facilitate comparisons.

---

35 **Comment Page 20 Line 26:** Remove the comma after “both”

**Reply to comment:** Removed as suggested.

40 **Changes in manuscript:** The slope of the PSD of both  $w$  and  $\Theta$  turns towards -5/3 for frequencies exceeding 2-Hz 108 m (2 Hz), which can be related to isotropic turbulence.

---

**Comment Page 20 Line 27:** change “smaller 0.3 Hz” to “smaller than 0.3 Hz”

**Reply to comment:** Changed as suggested.

45 **Changes in manuscript:** which show a slope of -5/3 for frequencies smaller 0.3-Hz than 721 m (0.3 Hz)

---

**Comment Page 20 Line 29:** remove the comma after “range”

**Comment Page 20 Line 29:** Please explicitly state the frequency range you are talking about

**Reply to comment:** Changed as suggested.

**Changes in manuscript:** The transition of geostrophic to isotropic turbulence as indicated by the transition of PSD-slopes occurs in the ~~frequency range~~; wave length range between 271 m to 721 m (corresponding to 0.8 Hz to 0.3 Hz) where the PSD of the vertical wind indicates a source of turbulent energy.

**Comment Page 22 Lines 1 and 8:** Starting these two paragraphs with “Further support for our hypothesis and our results come from the analysis of . . .” is unclear in both cases - Please state which aspect of your hypothesis is supported by the data in these introductory sentences.

**Reply to comment:** We clarified the sentence.

**Changes in manuscript:** Further support for our hypothesis ~~that mountain wave induced turbulence perturbed the N<sub>2</sub>O profile and our results~~ comes from the analysis of the cubic root of the eddy dissipation rate  $EDR = \epsilon^{1/3}$  from the measured 3D-winds

**Comment Page 22 Line 5:** “v” should also be a subscript in  $EDR_{u,v}$

**Comment Page 22 Line 6:** change “when also” to “where”

**Comment Page 22 Line 6:** change “was enhanced” to “was also enhanced”

**Reply to comment:** Changed as suggested.

**Changes in manuscript:** However, the values of  ~~$EDR_{u,v}$~~   $EDR_{u,v}$  for the horizontal wind components over the mountains are similar to those of the end of the leg, ~~when also~~ where  $EDR_w$  was also enhanced in the lee of the mountains.

**Comment Page 22 Line 9:** change “GTG (Graphical Turbulence Guidance)” to “Graphical Turbulence Guidance (GTG)”

**Reply to comment:** We changed it accordingly.

**Changes in manuscript:** Further support for our hypothesis and our results comes from the analysis of the occurrence of mountain wave induced turbulence using the ~~GTG (Graphical Turbulence Guidance)~~ Graphical Turbulence Guidance (GTG) using ECMWF operational analysis data

**Comment Page 22 Line 13:** change “upper flight” to “upper flight leg”

**Reply to comment:** We added it.

**Changes in manuscript:** The weak EDR at the upper flight leg in accordance with the weak turbulence occurrence as opposed to the lower leg



**Comment Page 23 Line 4:** change “activity the” to “activity at the”

**Comment Page 23 Line 4:** change “and propagating” to “that propagates”

5 **Comment Page 23 Line 5:** change “this observations” to “these observations”

**Reply to comment:** Changed as suggested.

10 **Changes in manuscript:** The evidence for strong orographic wave activity at the lower level and that propagating to the 10.9 km level serves as the only plausible explanation for this these observations.

---

**Comment Page 23 Line 7:** remove “occurrence”

15 **Reply to comment:** We removed it.

**Changes in manuscript:** The fact that at the higher level the turbulence is weak during the time of flight must be attributed to the time shift between the two flight legs and the high intermittency of turbulence occurrence.

20 **Comment Page 23 Line 10:** change “gravity wave occurrence” to “gravity waves”

**Reply to comment:** Change as suggested.

25 **Changes in manuscript:** We present an analysis of high resolution N<sub>2</sub>O measurements in the region of orographic gravity wave-occurrence waves over the Southern Alps in New Zealand during the DEEPWAVE 2014 campaign.

---

**Comment Page 23 Line 17:** change “ $\Theta$  also strong” to “ $\Theta$ , strong”

30 **Comment Page 23 Line 17:** change “were observed” to “were also observed”

**Reply to comment:** Changed as suggested.

35 **Changes in manuscript:** Corresponding to the fluctuations of the vertical wind and potential temperature  $\Theta$ -also  $\Theta$ , strong fluctuations of the tracer N<sub>2</sub>O were also observed at the upper flight leg in the region of the occurrence of orographic waves.

---

**Comment Page 23 Line 20:** change “gradient above” to “gradient was observed above”

40 **Reply to comment:** Changed as suggested.

**Changes in manuscript:** Upstream and downstream of the mountain different vertical gradients of N<sub>2</sub>O versus potential temperature  $\Theta$  were observed and enhanced variability of this gradient was observed above the mountains.

45 **Comment Page 23 Line 21:** comma after “inert”

**Reply to comment:** We added it.

**Changes in manuscript:** Since  $\text{N}_2\text{O}$  is chemically inert, a change of the  $\text{N}_2\text{O}$ - $\Theta$  relation must be due to cross-isentropic mixing effects

5

---

**Comment Page 23 Line 22:** change “ridge showing reversible” to “ridge with reversible”

**Reply to comment:** Changed as suggested.

10 **Changes in manuscript:** A scale dependent slope analysis shows that mixing was initiated over the mountain ridge ~~showing~~ with reversible displacements of tracer isopleths and  $\Theta$ .

---

**Comment Page 23 Line 23:** Again, please clarify what is meant by the “compact slope”

15 **Reply to comment:** Please see reply to comment page 15 line 5.

---

**Comment Page 23 Line 25:** “The behaviour” - what behavior? Please be specific. (also note the spelling of behavior without a "u" if you prefer to use American English spelling practices)

**Reply to comment:** We modified the sentence.

**Changes in manuscript:** ~~The behaviour~~ Mountain wave induced mixing is also consistent with the indication for wave breaking and momentum deposition above the mountains between the two flight legs.

35 A scale dependent slope analysis shows that mixing was initiated over the mountain ridge showing reversible displacements of tracer isopleths and  $\Theta$ . ~~Above the mountains these fluctuations perturbed the compact slope of  $\text{N}_2\text{O}$  in the inflow region around the tropopause.~~ These fluctuations must have perturbed the compact slope of the  $\text{N}_2\text{O}$ - $\Theta$  profile via the generation of turbulence and thus irreversible turbulent cross-isentropic mixing.

---

**Comment Page 23 Lines 28-29:** change “occurring potentially previously” to “that may have occurred”

**Reply to comment:** Changed as suggested.

35 **Changes in manuscript:** Still the power spectral energy spectra of  $\text{N}_2\text{O}$  and  $\Theta$  with slopes of  $-5/3$  at the smallest scales can be seen as the result of the turbulence ~~occurring potentially previously~~ that may have occurred on this level.

---

**Comment Page 23 Line 30:** “The tracer conserves the effect” - what tracer, and what effect? Please be specific.

**Reply to comment:** We specified the statement.

**Changes in manuscript:** The tracer ~~distribution~~ conserves the effect of prior occurrence of the highly transient turbulence occurrence.

45

---

**Comment Page 23 Lines 30-31:** Again, please define what a “compact relation” is.

**Reply to comment:** Please see replies to comment page 15 line 13 and line 14.

---

**Comment Page 23 Line 30-32:** “At... Mahalo et al., 2011)” - divide this sentence into two sentences. You could do this in line 31 by changing “mountains modulating” to “mountains. The modified compact N<sub>2</sub>O- $\theta$  relation also modulates”

5 **Comment Page 23 Line 32:** change “similar as” to “similar to the mechanism”

**Reply to comment:** We changed it accordingly.

10 **Changes in manuscript:** At the downstream side a modified compact N<sub>2</sub>O- $\theta$  relation establishes as a result of the wave induced turbulence above the ~~mountains modulating the mountains~~. The reversible air mass displacements induced by the gravity waves similar ~~as~~ to the mechanism described in (Moustaoui et al., 2010; Mahalov et al., 2011).

---

15 **Comment Page 24 Line 2:** change “to 0.5” to “to be 0.5”

**Reply to comment:** Changed as suggested.

20 **Changes in manuscript:** The vertical fluxes of N<sub>2</sub>O are estimated to be 0.5 ppbv m s<sup>-1</sup> corresponding to negative fluxes of O<sub>3</sub> of approximately 10 ppbv m s<sup>-1</sup>.

---

**Comment Page 24 Line 4:** remove comma after “fact”

25 **Comment Page 24 Line 5:** remove comma after “shows”

**Comment Page 24 Lines 7-8:** combine this sentence with the previous paragraph

30 **Comment Page 24 Line 7:** remove comma after “shows”

**Reply to comment:** Changed it accordingly.

35 **Changes in manuscript:** The fact~~;~~ that the modified relationship prevails downstream of the mountain shows~~;~~ that the turbulence associated with the orographic waves was associated with cross-isentropic mixing. This approach notably differs from local covariance analysis of vertical winds and tracers since it shows~~;~~ that at least part of the kinematic fluxes contributed to a cross-isentropic component

---

40 **Comment Page 24 Lines 9-16:** Use caution introducing new citations in the conclusions - some of these explanations and citations may be better suited to the introduction. The conclusions of your paper should focus specifically on your results.

**Reply to comment:** We added the gravity wave specific references to the introduction. We kept Riese et al., 2012 at the very end, because they motivate a more general aspect of mixing processes relevant for climate projections.

45 **Comment Page 24 Line 10:** replace “tropopause region and lower stratosphere” with “UTLS”

**Reply to comment:** Changed as suggested.

**Changes in manuscript:** Diabatic trace gas fluxes are key for understanding the effect of mixing processes on the large scale composition of the ~~tropopause region and the lower stratosphere~~ UTLS where they contribute to the mixing induced uncertainty of radiative forcing estimates

5

---

**Comment Page 24 Line 11:** change “and high degree” to “and a high degree”

**Comment Page 24 Line 12:** comma before “regions”

10

**Comment Page 24 Line 12:** remove “occurrence”

**Reply to comment:** We changed it accordingly.

15 **Changes in manuscript:** Though the occurrence of orographic waves has strong seasonality and a high degree of transience (Fritts and Alexander, 2003; Rapp et al., 2021), regions of gravity wave activity are hotspots for turbulence ~~occurrence~~ at the tropopause (Alexander and Grimsdell, 2013; Fritts and Alexander, 2003).

---

20 **Comment Comment Page 24 Line 13:** change “this” to “gravity wave induced turbulence”

**Reply to comment:** Changed as suggested.

25 **Changes in manuscript:** Our data show that ~~this~~ gravity wave induced turbulence can have a persistent effect on the distribution of species and thus a potential forcing impact of radiatively active tracers by changing their isentropic gradients.

---

**Comment Comment Page 24 Lines 15-16:** The organization and meaning of the last sentence is unclear.

30 **Reply to comment:** We reorganized the sentence.

**Changes in manuscript:** By subsequent isentropic transport as part of the stratospheric flow ~~their impact~~ the impact of radiatively active traces has a strong non-local component downwind ~~contributing the mountains~~. Thus, gravity wave induced mixing contributes to the overall mixing induced uncertainty of radiative forcing (Riese et al., 2012).
